# Supplementary material
Source: PubMed Central journal article supplement (PMC8237023)
Supplement: EJI-51-2330-s001.pdf [file EJI-51-2330-s001.pdf]

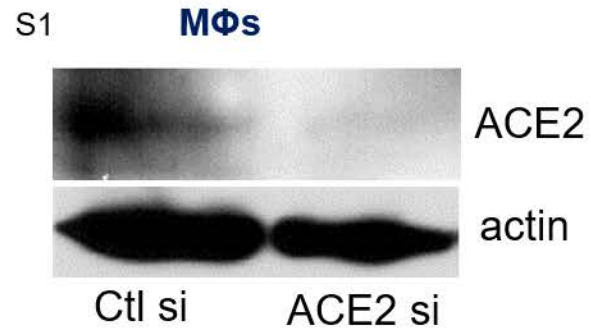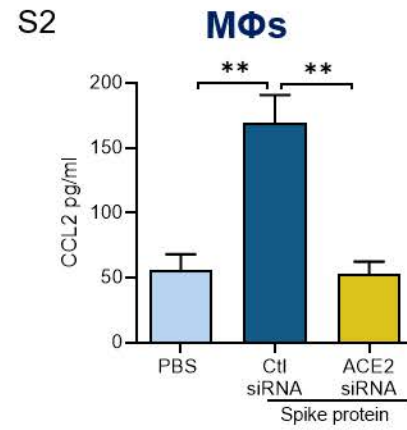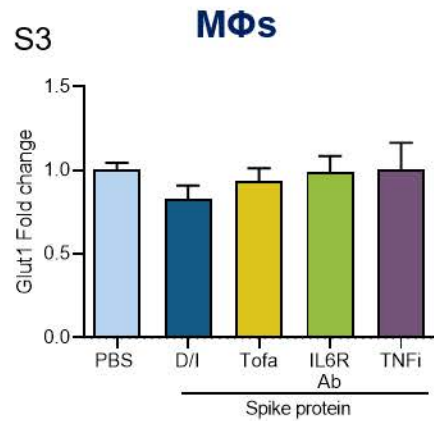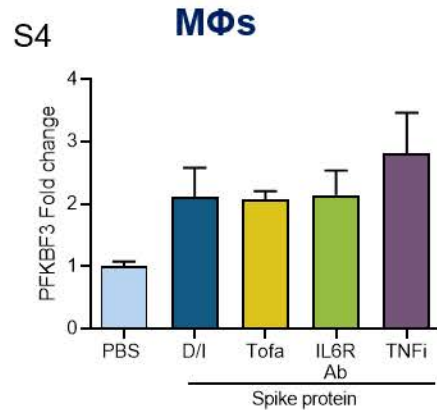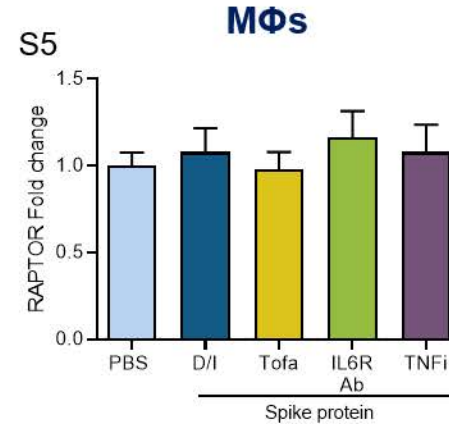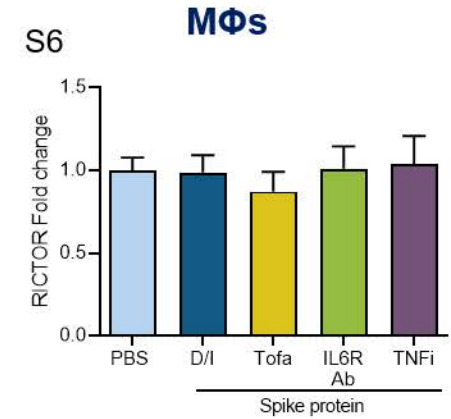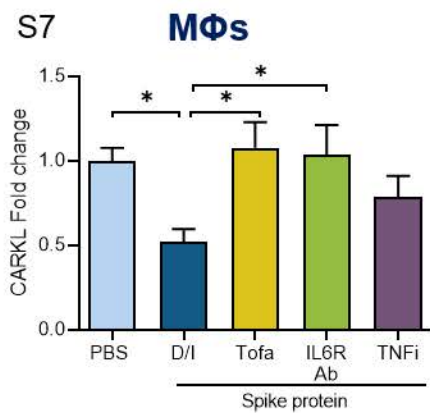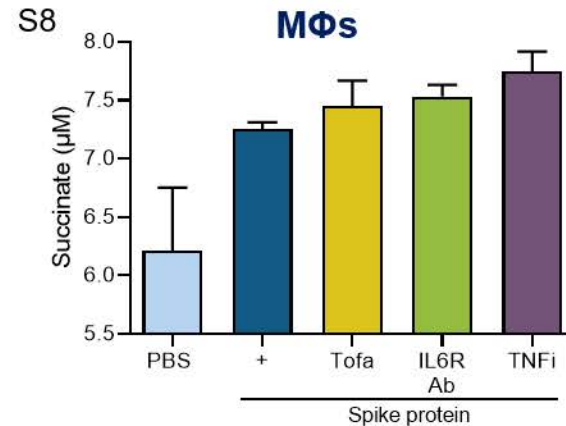

## S1 MΦs

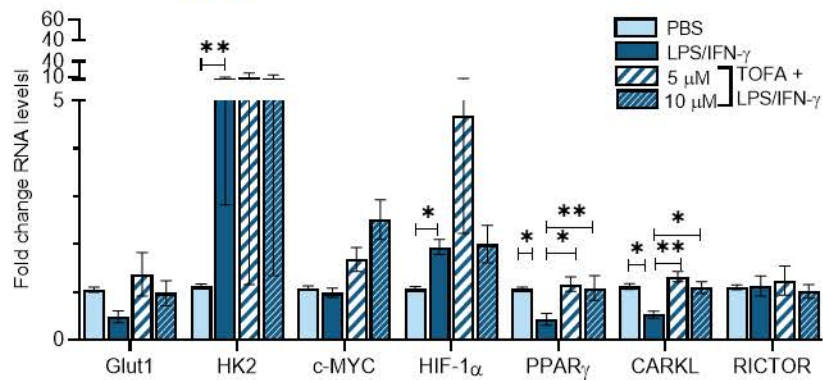

## S2 MΦs

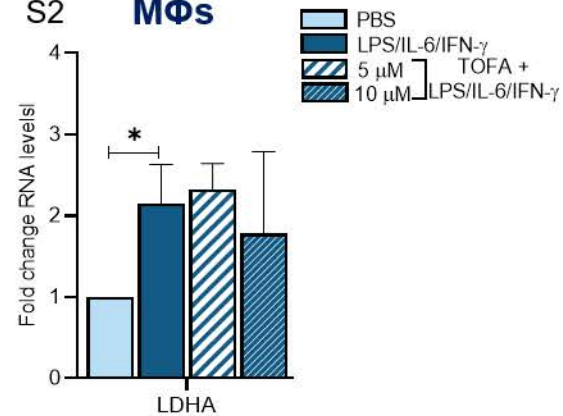

## S3 RA FLS

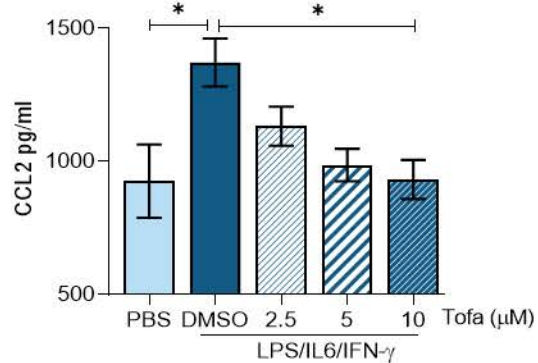

## S4 RA FLS

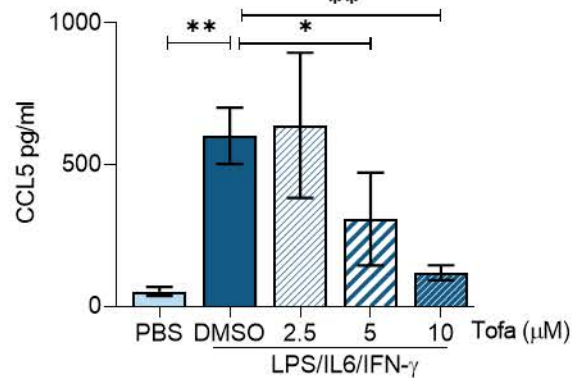

## S5 RA FLS

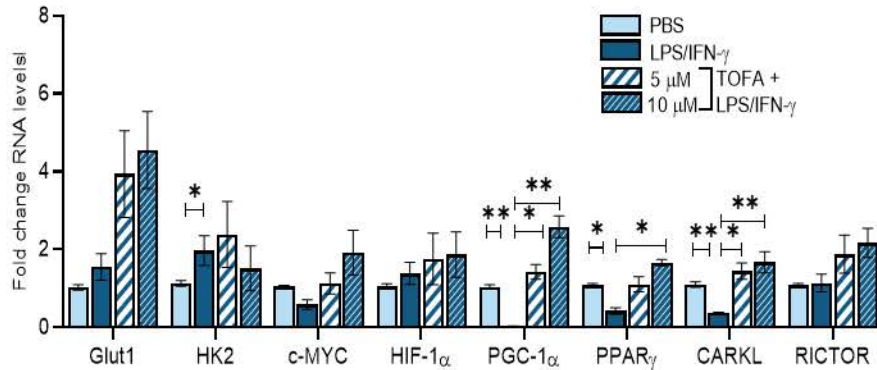

Figure 1B

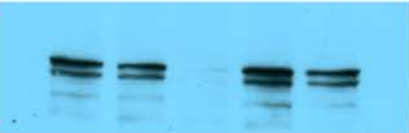

pSTAT1

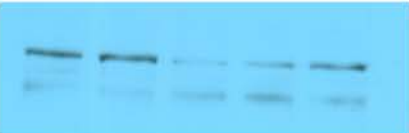

pSTAT3

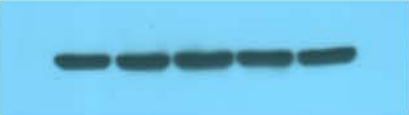

actin

Figure 3A

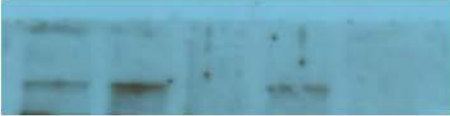

pSTAT1

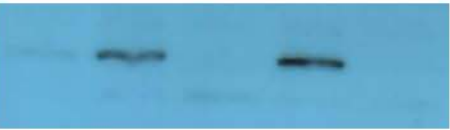

pSTAT3

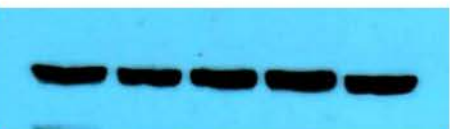

actin

Figure 4A

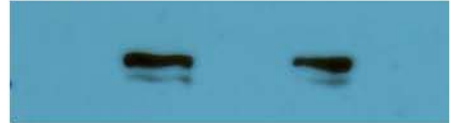

pSTAT1

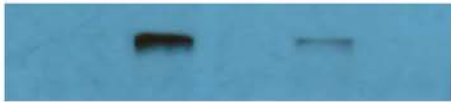

pSTAT3

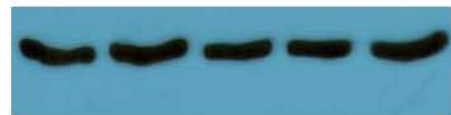

actin

# CD14/ACE2 gating

# Supplementary 4

Unstained

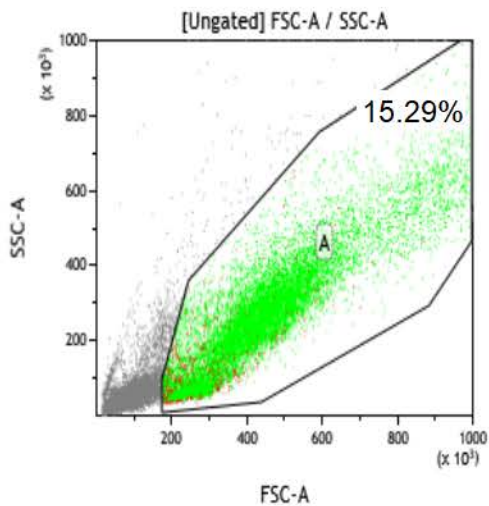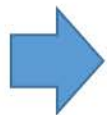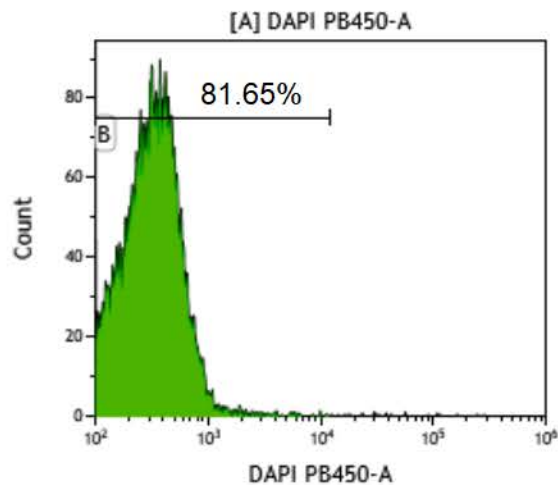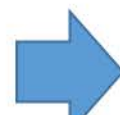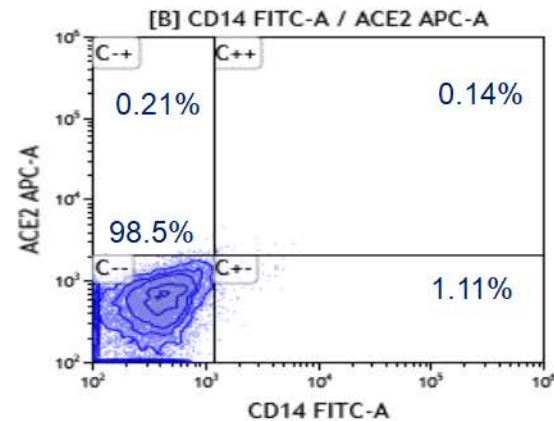

| Gate | Number | %Total | %Gated |
|------|--------|--------|--------|
| All  | 12,483 | 12.48  | 100.00 |
| C--  | 12,302 | 12.30  | 98.55  |
| C-+  | 26     | 0.03   | 0.21   |
| C+-  | 138    | 0.14   | 1.11   |
| C++  | 17     | 0.02   | 0.14   |

Sample

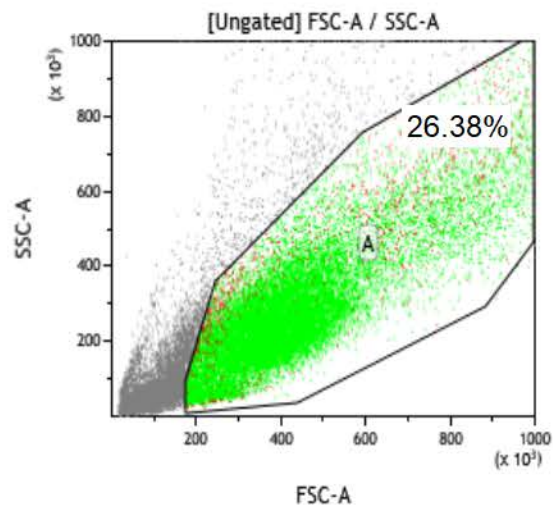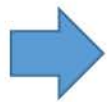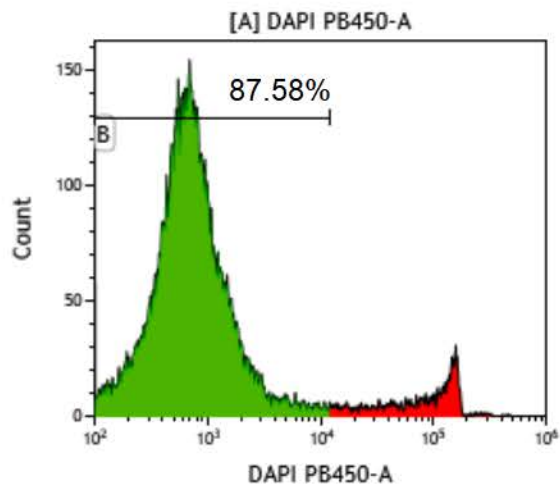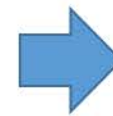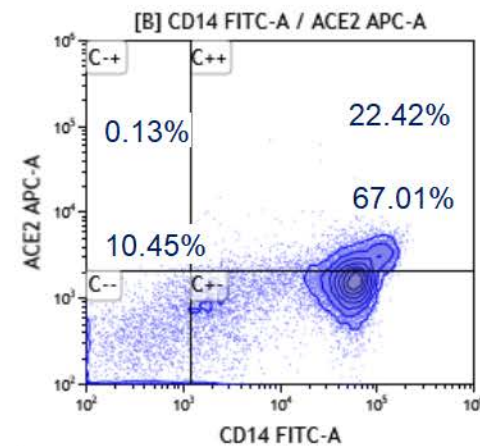

| Gate | Number | %Total | %Gated |
|------|--------|--------|--------|
| All  | 23,107 | 23.11  | 100.00 |
| C--  | 2,414  | 2.41   | 10.45  |
| C-+  | 29     | 0.03   | 0.13   |
| C+-  | 15,484 | 15.48  | 67.01  |
| C++  | 5,180  | 5.18   | 22.42  |

# PBMC -CD4/ACE2 gating

UNSTAINED

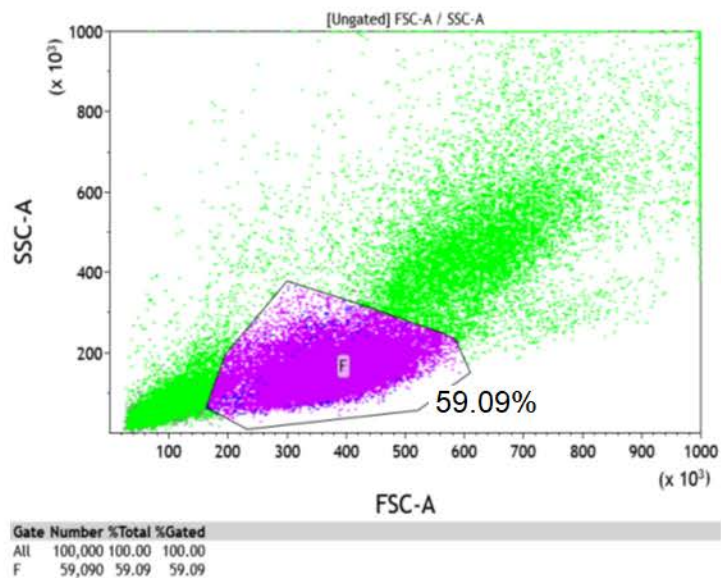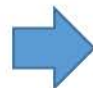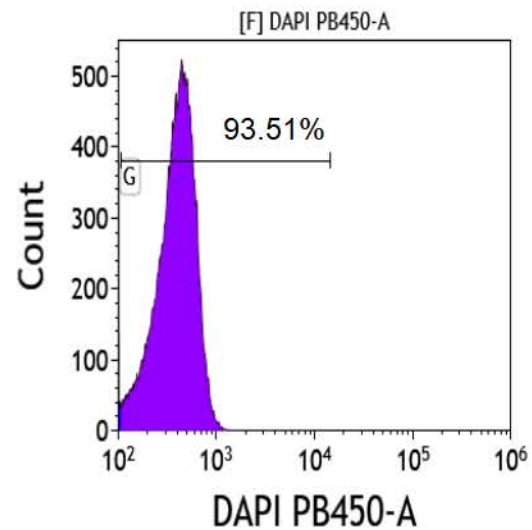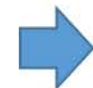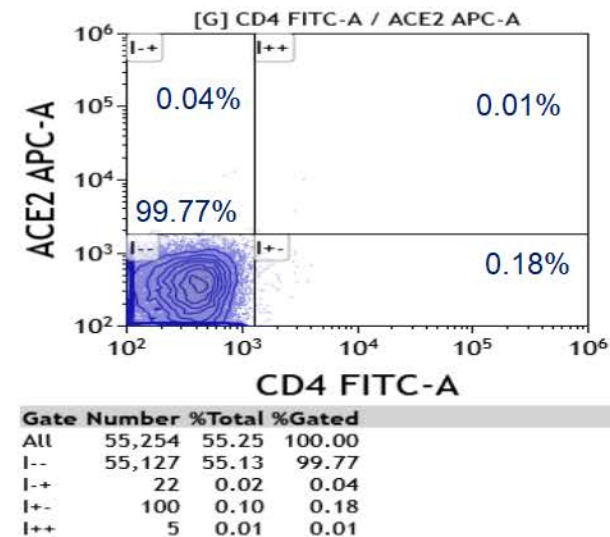

SAMPLE

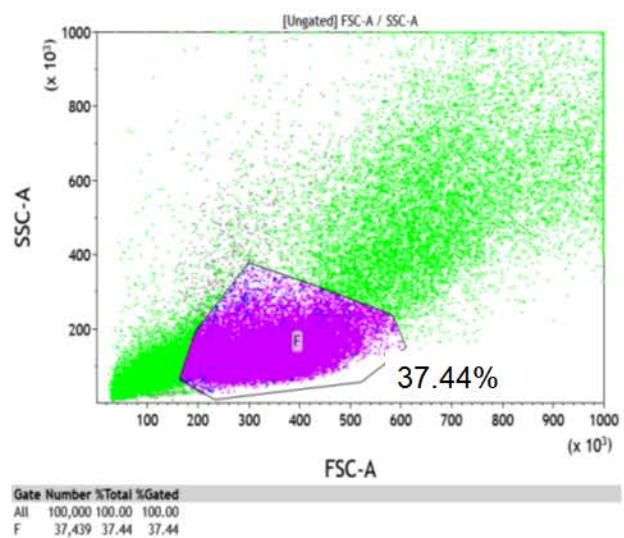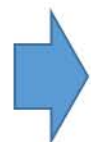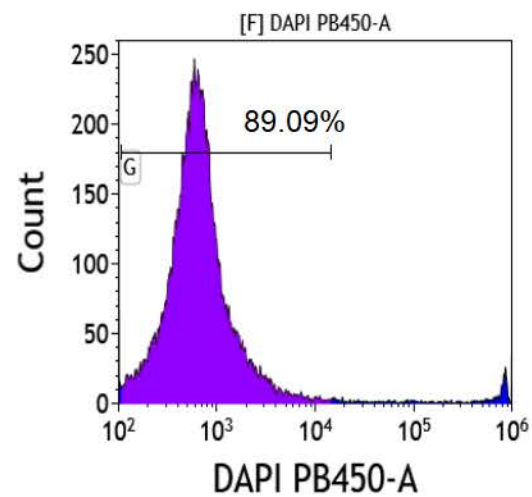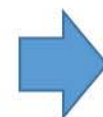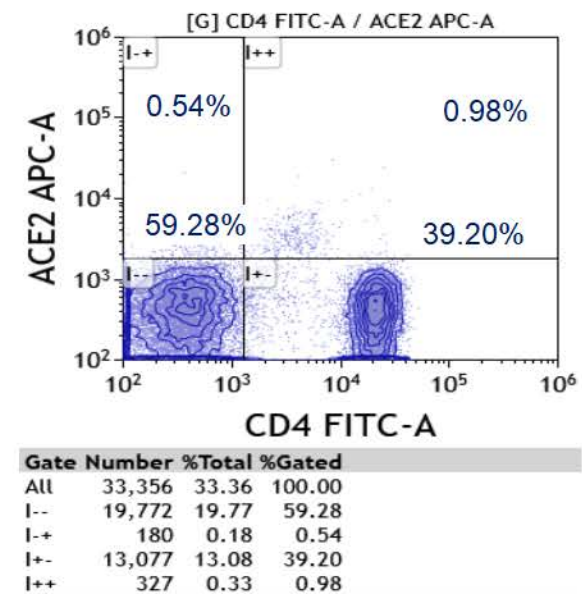

# Fibroblasts –ACE2 gating

## Supplementary 6

Unstained

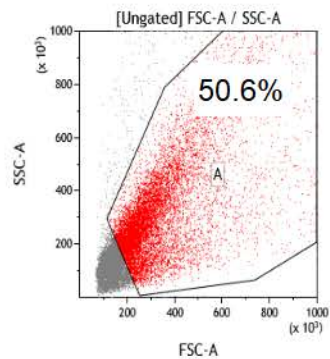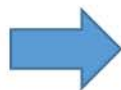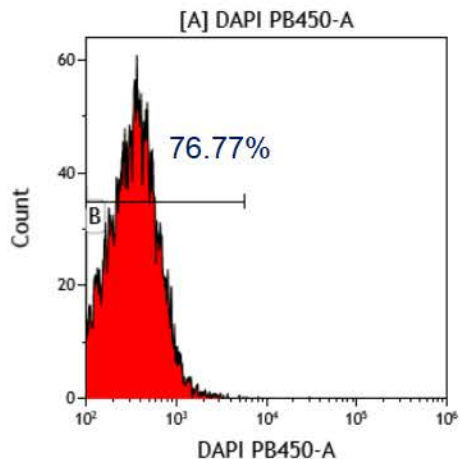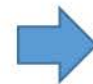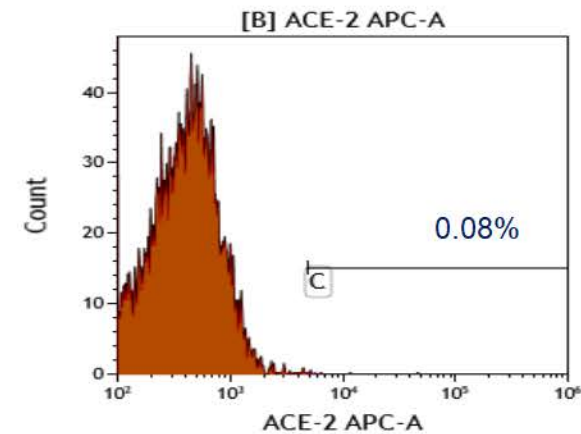

**Gate Number %Total %Gated**

All 10,909 50.66 100.00

B 8,375 38.90 76.77

**Gate Number %Total %Gated**

All 8,375 38.90 100.00

C 7 0.03 0.08

sample

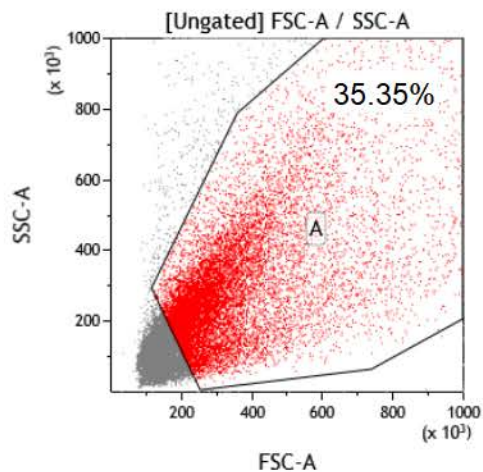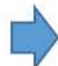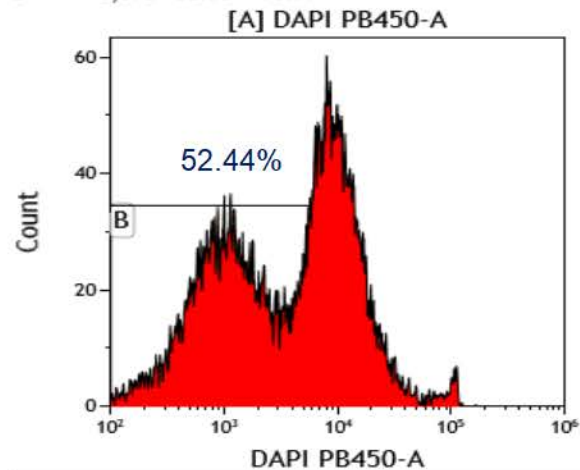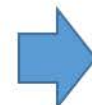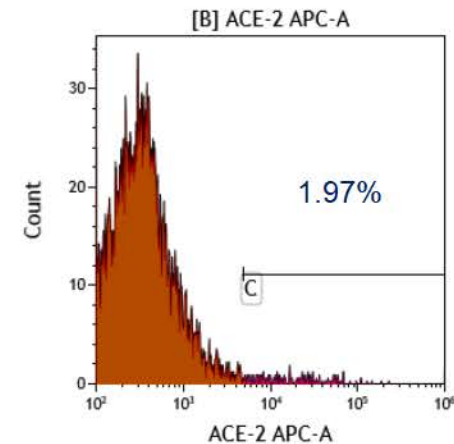

**Gate Number %Total %Gated**

All 14,244 35.35 100.00

B 7,469 18.53 52.44

**Gate Number %Total %Gated**

All 7,469 18.53 100.00

C 147 0.36 1.97
